# Supplementary material
Source: PubMed Central journal article supplement (PMC10195032)
Supplement: NIHMS1892626-supplement-2.pdf [file NIHMS1892626-supplement-2.pdf]

S1A

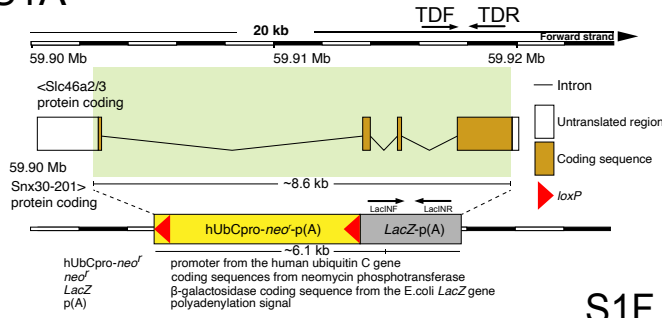

S1B

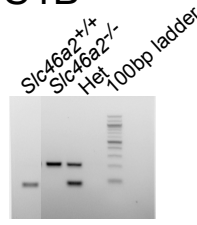

S1C

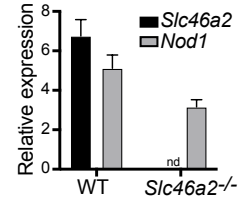

S1D

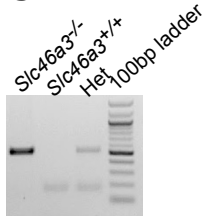

S1E

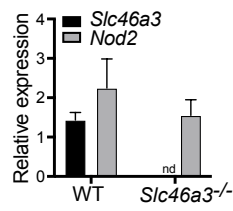

S1F

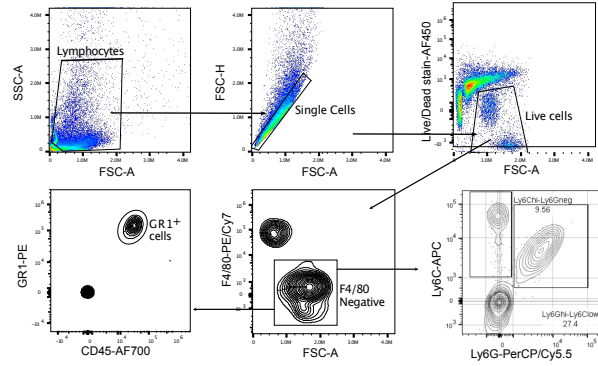

S1G

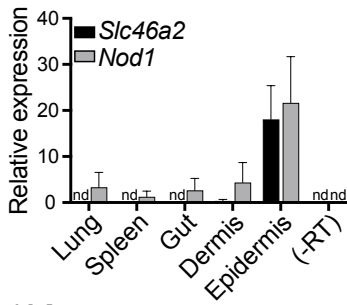

S1H

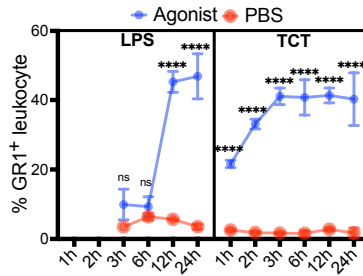

S1I

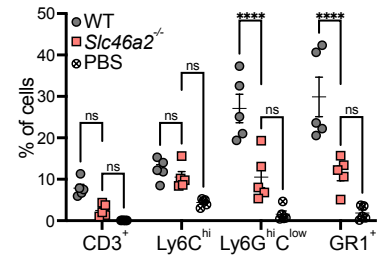

S1K

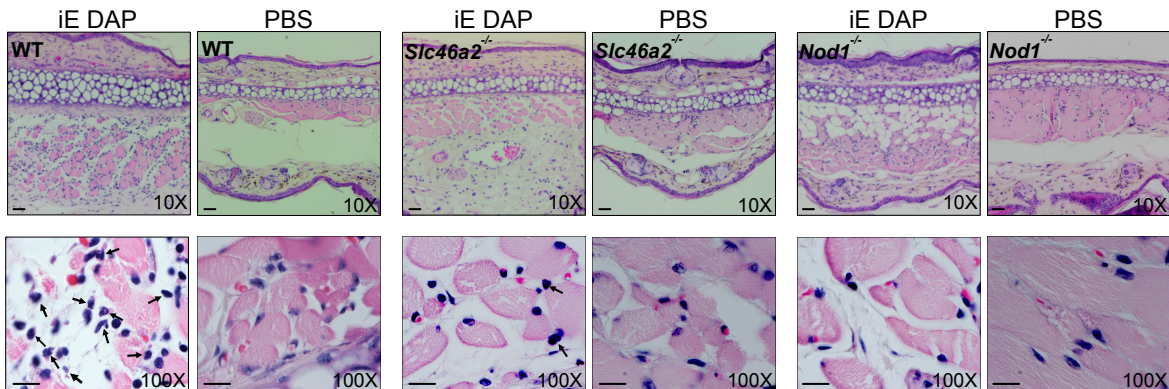

Figure S1

**Figure S1, related to Figure 1: *Slc46a2* expression in the epidermis is lost in knockout animals, while DAP-muropeptide triggers rapid neutrophil recruitment to the skin**

(A) Design of *Slc46a2* and *Slc46a3* null alleles. The gene region was replaced with ZEN-UB1 targeting cassette by homologous recombination. Primers used for genotyping are indicated. Adapted from velocigene ([www.velocigene.com](http://www.velocigene.com)) and Ensembl genome browser.

(B) Agarose gel of PCR genotyping for validation of *Slc46a2* knockout mice.

(C) Quantitative RT-PCR from WT and *Slc46a2*<sup>-/-</sup> mouse epidermis for *Slc46a2* and *Nod1* expression. *Slc46a2*<sup>-/-</sup> epidermis showed no *Slc46a2* expression.

(D) Agarose gel of PCR genotyping for validation of *Slc46a3* knockout mice.

(E) Quantitative RT-PCR from WT and *Slc46a3*<sup>-/-</sup> mouse epidermis for *Slc46a3* and *Nod2* expression. *Slc46a3*<sup>-/-</sup> epidermis showed no *Slc46a3* expression.

(F) Gating strategy for scoring GR1<sup>+</sup> and Ly6C&G leukocytes by flow cytometry.

(G) Expression analysis of *Slc46a2* and *Nod1* in indicated mouse organs. Maximum expression of both *Slc46a2* and *Nod1* was observed in the epidermis. nd; not detected.

(H) Neutrophil recruitment to pinnae were measured at indicated time points after intradermal injection of 10  $\mu$ l of 10  $\mu$ g/ml LPS or 8  $\mu$ M TCT in one ear compared to a similar volume of PBS injection, as a control, in the contralateral ear. TCT triggered robust and rapid neutrophil recruitment in the skin while the response to LPS is slower.

(I) Recruitment of immune cells stained with CD3, Ly6C and Ly6G, or Gr-1 3hrs after 30 $\mu$ M iE-DAP or PBS challenge in pinnae. Both Ly6G<sup>hi</sup> & Ly6C<sup>low</sup> and Gr-1<sup>+</sup> staining showed a similar pattern of neutrophil recruitment in WT and *Slc46a2* mutant mice, with the mutant showing a dramatic reduction in neutrophil recruitment with either assay. Neither Ly6C<sup>hi</sup> nor CD3<sup>+</sup> cells were significantly recruited compared to WT pinnae at this time point.

(K) Representative H&E stained histological sections from the mouse ear 3 hr after intradermal injection of 10 $\mu$ l of 30 $\mu$ M iE-DAP or equal volume of PBS in WT, *Slc46a2*<sup>-/-</sup>, and *Nod1*<sup>-/-</sup> mice. Images in inset show an area at higher magnification. iE-DAP recruited inflammatory cells in WT but not in *Slc46a2*<sup>-/-</sup>, and *Nod1*<sup>-/-</sup> mice skin, whereas PBS injection did not induce inflammatory reaction; multi-lobed neutrophils indicated with arrows.

In panels C, E, and G each condition shown as a mean with SEM from three independent experiments. For panel H, each data point is mean with SEM from one trial with 5 mice at each time point and uses two-way ANOVA and Tukey's multiple comparisons tests. Panel I, each dot represents an individual animal, data pooled from two to four separate trials and analyzed by two-way ANOVA and Tukey's multiple comparisons tests. Panels B, D, and K are representative images of at least three independent experiments. \*\*\*\* P < 0.0001; \*\* P < 0.01; ns, not significant. The scale bar is 100 $\mu$ M.

S2A

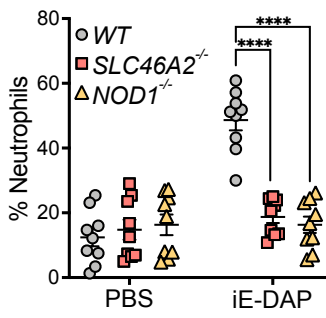

S2B

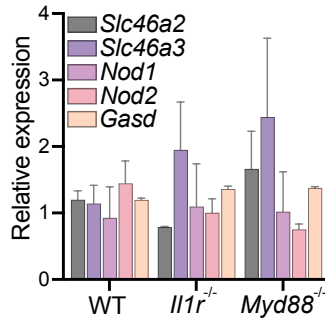

S2C

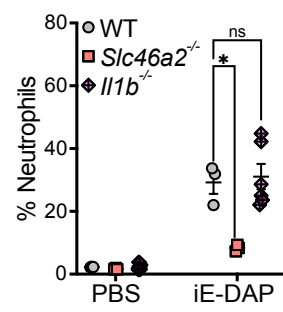

S2D

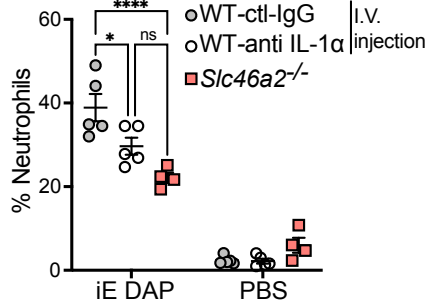

S2E

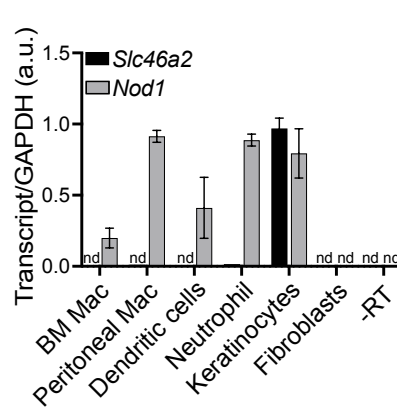

S2F

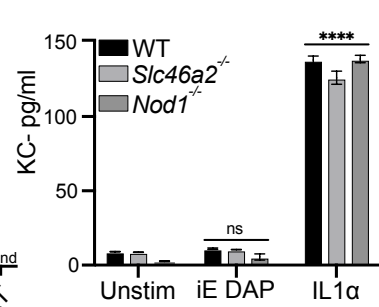

S2G

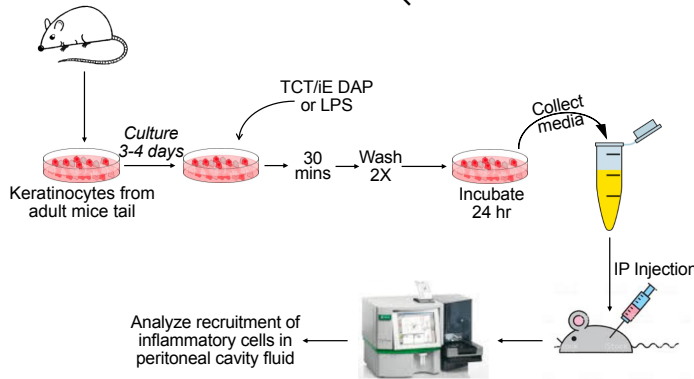

S2H

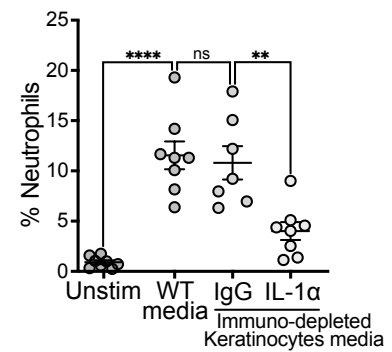

S2I

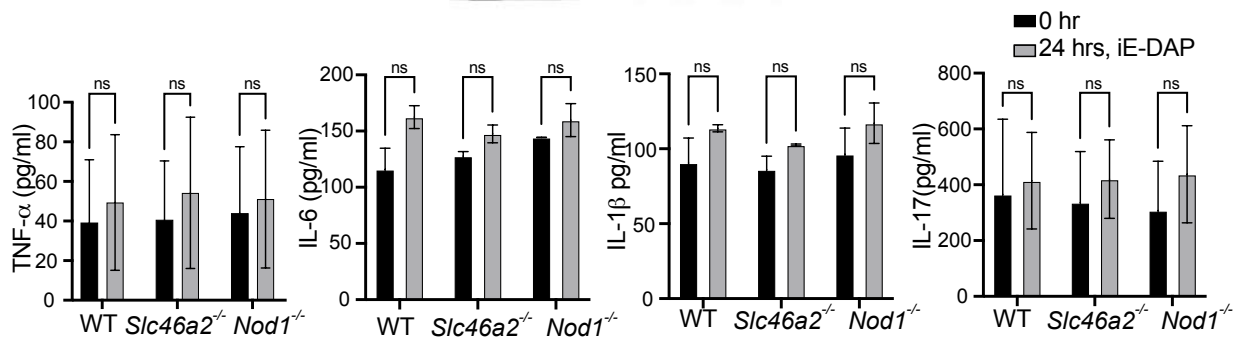

Figure S2

**Figure S2, related to Figure 1: *Slc46a2*-dependent response to topical DAP-muropeptides recruits neutrophils and induces IL-1a**

(A) Neutrophil recruitment was measured in WT, *Slc46a2*<sup>-/-</sup> or *Nod1*<sup>-/-</sup> mice pinnae 3 h after topical application of 10  $\mu$ l of 30 $\mu$ M iE-DAP to tape stripped mouse skin. WT skin responded to the iE-DAP challenge unlike *Slc46a2*<sup>-/-</sup> and *Nod1*<sup>-/-</sup> skin.

(B) RT-qPCR analysis of *Slc46a2*, *Slc46a3*, *Nod1*, and *Nod2* expression in keratinocytes isolated from WT, *Il1r*, and *Myd88* mutant mice. None of these genes were significantly changed in any of these genotypes.

(C) Neutrophil recruitment was measured in WT, *Il1b*<sup>-/-</sup> and *Slc46a2*<sup>-/-</sup> mice pinnae in response to intradermal challenge with 10  $\mu$ l of 30 $\mu$ M iE-DAP. No significant difference was observed in cell recruitment in *Il1b*<sup>-/-</sup> mice compared to WT.

(D) Mice were intravenously injected with IL-1a blocking antibody (1  $\mu$ g/mouse), or isotype-matched IgG control, 1 hour prior to intradermal injection of 10  $\mu$ l of 30  $\mu$ M iE-DAP, and 3 h later neutrophil recruitment was measured. Neutralization of IL-1a significantly reduced the recruitment of leukocytes in WT mice.

(E) Expression analysis of *Slc46a2* and *Nod1* in specific cell types isolated from mice, by qRT-PCR. The highest expression of *Slc46a2* was observed in keratinocytes. n.d; not detected.

(F) Primary dermal fibroblasts from WT, *Slc46a2*<sup>-/-</sup> and *Nod1*<sup>-/-</sup> mice were challenged with iE-DAP (30  $\mu$ M) or IL-1a (10 ng/ml) for 24hrs and CXCL1 (KC) was measured by ELISA from culture media. KC was induced in fibroblasts treated with IL-1 $\alpha$ , regardless of their *Slc46a2* or *Nod1* genotype, but fibroblasts were unresponsive to iE-DAP.

(G) Schematic representation of experimental design for preparation of and bioassay analysis of conditioned media from primary mouse keratinocyte cultures.

(H) Anti-IL-1a antibody was used to deplete this cytokine from keratinocyte conditioned media prior to IP injection. IL-1a depleted media showed reduced neutrophil recruitment compared to control IgG antibody-treated media.

(I) TNF $\alpha$ , IL-6, IL-1 $\beta$  and IL-17 cytokines measured by ELISA from WT, *Slc46a2*<sup>-/-</sup> and *Nod1*<sup>-/-</sup> keratinocyte media before and after challenge with 30  $\mu$ M iE-DAP for 24hrs. No significant induction in any of these cytokines was detected.

For panels A, C, D, and H each dot represents an individual animal, data pooled from two to four separate trials, and analyzed by two-way ANOVA and Tukey's multiple comparisons tests. In panels B, E, F, and I, data is shown as a mean of three independent experiments with SEM. B, F and I use two-way ANOVA and Tukey's multiple comparisons test to determine significance. \*\*\*\* P < 0.0001; \*\* P < 0.01; ns, not significant.



**Figure S3, related to Figure 3: MTX blocks the transport of DAP muropeptides through SLC46A2 and MDP through SLC46A3**

(A) WT, *Slc46a2*<sup>-/-</sup> and *Nod1*<sup>-/-</sup> keratinocytes were challenged with 30 μM click-iE DAP or 10 μM click-MDP for 30 minutes and 60 minutes, as labeled, washed extensively, and then lysed. Muropeptides were then detected in these lysates with click-reacted CalFluor 488 Azide and fluorescence quantified. With click-iE-DAP, *Slc46a2*<sup>-/-</sup> keratinocytes showed significantly reduced fluorescence intensity compared to WT or *Nod1*<sup>-/-</sup> keratinocytes, while no change in fluorescence intensity was observed with click-MDP in all genotypes.

(B) Fluorescent confocal microscopy of WT, *Slc46a2*<sup>-/-</sup>, *Slc46a3*<sup>-/-</sup> and *Nod1*<sup>-/-</sup> keratinocytes, challenged with 10 μM “click-MDP” for 1h. WT, *Slc46a2*<sup>-/-</sup>, and *Nod1*<sup>-/-</sup> keratinocytes show a similar import of click-MDP whereas *Slc46a3*<sup>-/-</sup> keratinocytes displayed reduced click-MDP import. Also, MTX-treated WT keratinocytes showed diminished transport of click-MDP.

(C) Fluorescent confocal microscopy of WT, *Slc46a2*<sup>-/-</sup> and *Nod1*<sup>-/-</sup> primary keratinocytes treated with NPs loaded with iE-DAP and immunofluorescent dye. Localization of dye inside the keratinocytes shows the successful delivery NP delivery of cargo. No change in fluorescence intensity was observed in all genotypes.

(D) IL-1α in culture media of WT and *Slc46a2*<sup>-/-</sup> keratinocytes after stimulating with 30 μM iE DAP for 24 hours, measured by ELISA. WT keratinocytes were also treated with 250 μM MTX along with iE-DAP. Like *Slc46a2* deficiency, MTX prevented IL-1α release in iE-DAP-treated WT keratinocytes.

(E) Similar to (A), MTX (250 μM) or unlabeled iE-DAP (30 μM) interfered with the cellular uptake of click-iE-DAP in WT or *Nod1*<sup>-/-</sup>, keratinocytes, while in *Slc46a2*<sup>-/-</sup> cells import was low and unchanged.

(F) Immunofluorescent images of WT, *Slc46a2*<sup>-/-</sup> and *Nod1*<sup>-/-</sup> keratinocytes pretreated with 250 μM MTX and then iE-DAP delivered by dye-loaded NP. Addition of MTX did not affect the NP-mediated dye delivery in any genotype.

(G) IL-1α ELISA of supernatant from WT keratinocytes treated with increasing concentrations of SSZ. SSZ potently inhibits the IL-1α release from keratinocytes. UT is untreated cells and N.I. is no inhibitor.

In panels A, D, E, and G data is shown as a mean and SEM for at least three independent experiments and analyzed by two-way ANOVA and Tukey's multiple comparisons. Panels B, C, and F are representative images of at least three independent experimental results. \*\*\*\* P < 0.0001; \*\* P < 0.01; ns, not significant. The scale bar is 10 μM.









**Figure S5, related to Figure 5: MTX blocks the psoriatic inflammation in skin**

(A) Representative H&E stained histology of ear sections from VAS (Vaseline, as a vehicle) applied to skin from WT, *Slc46a2*<sup>-/-</sup> and *Nod1*<sup>-/-</sup> mice. VAS applied to skin did not show signs of inflammation in any genotype.

(B) H&E stained histology sections from IMQ (3 days) and *C. accolens* (3 days, Bac) applied skin. WT skin shows hyper inflammation compared to *Slc46a2*<sup>-/-</sup> and *Nod1*<sup>-/-</sup> mice skin.

(C) Representative H&E stained histology of ear sections from VAS (Vaseline, as a vehicle, 3 days) plus *C. accolens* (3 days, Bac) applied to skin from WT, *Slc46a2*<sup>-/-</sup> and *Nod1*<sup>-/-</sup> mice. VAS plus *C. accolens* applied skin did not show signs of inflammation in any genotype.

(D) Enumeration of CFUs from the ear pinnae of mice 24 h after topical application of *C. accolens* (10<sup>7</sup> CFU). Control ear pinnae left unassociated. Each dot represents an individual mouse.

(E) H&E stained histology sections from IMQ and methotrexate (MTX) treated skin from WT, *Slc46a2*<sup>-/-</sup> and *Nod1*<sup>-/-</sup> mice. After the application of MTX, WT skin was less inflamed compared to IMQ-treatment in Fig. 5B, whereas MTX had minimal effect on *Slc46a2*<sup>-/-</sup> and *Nod1*<sup>-/-</sup> mice skin.

(F) Representative H&E stained histology of ear sections from VAS (Vaseline, as a vehicle) and methotrexate (MTX) applied to skin from WT, *Slc46a2*<sup>-/-</sup> and *Nod1*<sup>-/-</sup> mice. VAS-applied skin did not show signs of inflammation in any genotype.

(G) CXCL8 expression was analyzed in skin organoids after iE-DAP challenge to the top (epidermal) or bottom (dermal) layer. CXCL8 response was only observed in dermal fibroblast when an iE-DAP challenge was delivered to the top epidermal layer.

(H) WT mouse primary dermal fibroblasts were cultured for 24 h in conditioned media from WT, *Slc46a2*<sup>-/-</sup> or *Nod1*<sup>-/-</sup> mouse keratinocytes, that were stimulated or not with 30 μM iE-DAP for 24 h. As a control WT, *Slc46a2*<sup>-/-</sup> and *Nod1*<sup>-/-</sup> fibroblasts were treated with IL1-α (10ng/ml). KC was induced in fibroblasts cultured in condition media from WT keratinocytes treated with iE-DAP, but not the mutant cells, while fibroblasts treated with IL1-α produced KC in all genotypes.

Panels A, B, C, E, and F are representative images of at least three independent experimental trials. In panel D, each dot represents a separate trail and was analyzed by unpaired t-test. Panel G is representative of three independent trials, error bars display technical variation. In panel H, data is shown as a mean for at least three independent experiments with SEM and analyzed by two-way ANOVA and Tukey's multiple comparisons test. \*\*\*\* P < 0.0001; \*\* P < 0.01; ns, not significant. The scale bar is 100μM.
